# Supplementary material for: Tidal inlet seafloor changes induced by recently built hard structures
Source: PubMed Central journal article supplement (PMC6795416; doi:10.1371/journal.pone.0223240), 2019-10-16
Supplement: pone.0223240.s001.pdf [file pone.0223240.s001.pdf]

# Tidal inlet seafloor changes induced by recently built hard structures

Carlotta Toso<sup>1,2\*</sup>, Fantina Madricardo<sup>1</sup>, Emanuela Molinaroli<sup>2</sup>, Stefano Fogarin<sup>1,2</sup>, Aleksandra Kruss<sup>1</sup>, Antonio Petrizzo<sup>1</sup>, Nicola Marco Pizzeghello<sup>3</sup>, Luigi Sinapi<sup>3</sup> Fabio Trincardi<sup>4</sup>,

**1** Istituto di Scienze Marine-Consiglio Nazionale delle Ricerche, Arsenale - Tesa 104, Castello 2737/F, 30122 Venezia, Italy

**2** Department of Environmental Sciences, Informatics and Statistics (DAIS), Università Ca' Foscari Venezia, Campus Scientifico, Via Torino 155, Mestre, VE, Italy

**3** Istituto Idrografico della Marina, Passo all'Osservatorio 4, Genova 16134, Italy

**4** Dipartimento Scienze del Sistema Terra e Tecnologie per l'Ambiente, Piazzale Aldo Moro 7, Roma, Italy

\* toso.carlotta@gmail.com

## Supporting Information

**S1 Table** Grain size and textural parameters of sediment samples. The position of every sample is shown in Fig 5.

| Sample | Textural group              | Mean    | Sorting | Mode 1   | Mode 2   | D50      | Gravel (%) | Sand (%) | Mud (%) |
|--------|-----------------------------|---------|---------|----------|----------|----------|------------|----------|---------|
| A01    | Gravel                      | 5685.66 | 6.49    | 12000.00 | -        | 10869.65 | 83.3       | 12.9     | 3.8     |
| A02    | Sandy Mud                   | 22.42   | 4.42    | 26.70    | 106.70   | 25.56    | 0.0        | 28.7     | 71.3    |
| A03    | Muddy Sandy Gravel Gravelly | 1082.41 | 7.33    | 302.00   | 12000.00 | 1200.40  | 45.8       | 48.5     | 5.6     |
| A04    | Muddy Sand                  | 227.34  | 4.11    | 213.50   | -        | 222.39   | 8.4        | 82.3     | 9.3     |
| A05    | Muddy Sandy Gravel          | 958.34  | 8.63    | 302.00   | 12000.00 | 1395.53  | 47.1       | 44.8     | 8.1     |
| A06    | Muddy Sandy Gravel          | 510.80  | 14.10   | 213.50   | 12000.00 | 255.95   | 37.2       | 44.1     | 18.7    |
| A07    | Slightly Gravelly Sand      | 242.86  | 2.51    | 302.00   | -        | 269.64   | 0.9        | 93.7     | 5.4     |
| A08    | Muddy Sandy Gravel          | 3422.55 | 11.67   | 47250.00 | 12000.00 | 7358.47  | 68.6       | 24.1     | 7.3     |
| A09    | Gravelly Sand               | 606.94  | 4.75    | 302.00   | -        | 362.86   | 22.9       | 74.0     | 3.1     |
| A10    | Muddy Sandy Gravel          | 1439.15 | 6.58    | 6000.00  | 302.00   | 2542.22  | 55.5       | 39.8     | 4.7     |
| A11    | Gravelly Sand               | 378.84  | 3.28    | 302.00   | -        | 338.15   | 8.3        | 87.6     | 4.1     |
| A12    | Gravelly Sand               | 688.69  | 4.61    | 427.00   | 12000.00 | 462.26   | 23.7       | 72.5     | 3.8     |
| A13    | Gravelly Sand               | 458.24  | 2.85    | 427.00   | -        | 432.78   | 5.4        | 91.5     | 3.1     |
| A14    | Sandy Gravel                | 1180.10 | 7.75    | 6000.00  | 163.00   | 2296.56  | 52.3       | 43.8     | 3.9     |
| A15    | Sandy Gravel                | 1285.05 | 6.85    | 302.00   | 12000.00 | 1114.69  | 44.2       | 52.9     | 3.0     |
| A16    | Sandy Gravel                | 2308.41 | 5.69    | 12000.00 | 302.00   | 4044.50  | 60.8       | 37.4     | 1.8     |
| A17    | Sand                        | 233.41  | 1.44    | 213.50   | -        | 232.40   | 0.0        | 100.0    | 0.0     |
| A18    | Muddy Sandy Gravel          | 882.39  | 9.52    | 213.50   | 12000.00 | 346.88   | 39.8       | 53.1     | 7.1     |
| A19    | Muddy Sandy Gravel          | 849.83  | 8.60    | 213.50   | 6000.00  | 389.07   | 41.4       | 51.0     | 7.6     |
| A20    | Sandy Gravel                | 1408.69 | 6.53    | 427.00   | 1500.00  | 870.51   | 33.9       | 64.0     | 2.2     |
