# Supplementary material for: Tidal inlet seafloor changes induced by recently built hard structures
Source: PubMed Central journal article supplement (PMC6795416; doi:10.1371/journal.pone.0223240), 2019-10-16
Supplement: pone.0223240.s002.pdf [file pone.0223240.s002.pdf]

# Tidal inlet seafloor changes induced by recently built hard structures

Carlotta Toso<sup>1,2\*</sup>, Fantina Madricardo<sup>1</sup>, Emanuela Molinaroli<sup>2</sup>, Stefano Fogarin<sup>1,2</sup>, Aleksandra Kruss<sup>1</sup>, Antonio Petrizzo<sup>1</sup>, Nicola Marco Pizzeghello<sup>3</sup>, Luigi Sinapi<sup>3</sup> Fabio Trincardi<sup>4</sup>,

**1** Istituto di Scienze Marine-Consiglio Nazionale delle Ricerche, Arsenale - Tesa 104, Castello 2737/F, 30122 Venezia, Italy

**2** Department of Environmental Sciences, Informatics and Statistics (DAIS), Università Ca' Foscari Venezia, Campus Scientifico, Via Torino 155, Mestre, VE, Italy

**3** Istituto Idrografico della Marina, Passo all'Osservatorio 4, Genova 16134, Italy

**4** Dipartimento Scienze del Sistema Terra e Tecnologie per l'Ambiente, Piazzale Aldo Moro 7, Roma, Italy

\* toso.carlotta@gmail.com

## Supporting Information

**S2 Table** Confusion matrix.

|                        |                    | Samples Groups |      |      | total rows | users accuracy |                  |             |
|------------------------|--------------------|----------------|------|------|------------|----------------|------------------|-------------|
|                        |                    | I              | II   | III  |            |                |                  |             |
| Classified Backscatter | I                  | 1              | 1    | 0    | 2          | 0.50           |                  |             |
|                        | II                 | 0              | 4    | 2    | 6          | 0.67           |                  |             |
|                        | III                | 0              | 2    | 10   | 12         | 0.83           |                  |             |
|                        | total columns      | 1              | 7    | 12   | 20         |                |                  |             |
|                        | producers accuracy | 1.00           | 0.57 | 0.83 |            |                | overall accuracy | <b>0.75</b> |
